# Supplementary material for: Effect of tcdR Mutation on Sporulation in the Epidemic Clostridium difficile Strain R20291
Source: PubMed Central journal article supplement (PMC5311115; doi:10.1128/msphere.00383-16), 2017-02-15

R20291::*tcdR*

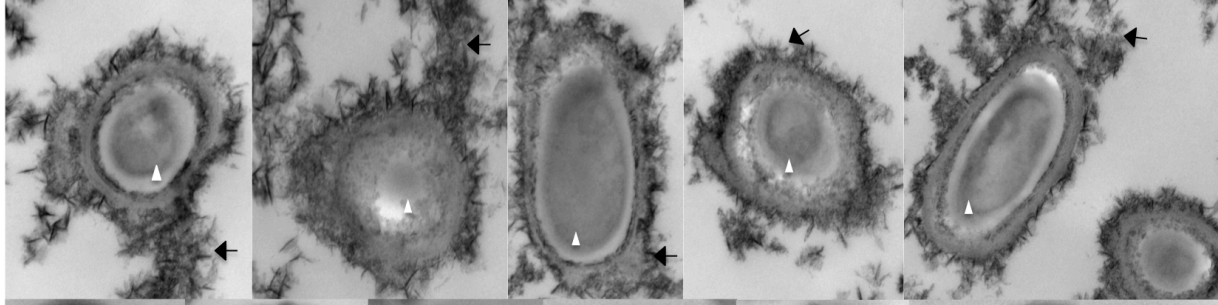

R20291

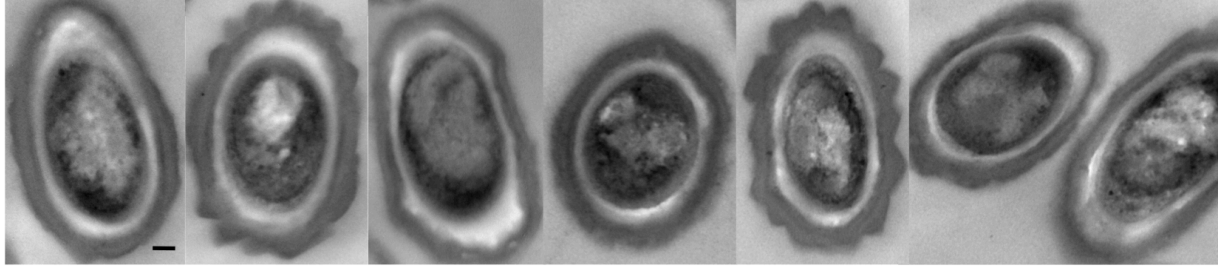

Supplement: sph002172235sf7.pdf [file sph002172235sf7.pdf]
